# Supplementary material for: German-Wide Analysis of the Prevalence and the Propagation Factors of the Zoonotic Dermatophyte Trichophyton benhamiae
Source: PubMed Central journal article supplement (PMC7558194; doi:10.3390/jof6030161), 2020-09-03
Supplement: jof-06-00161-s001.pdf [file jof-06-00161-s001.pdf]

# Questionnaire on *Trichophyton benhamiae*

**Total number of patients in 2018**

**Number of *T. benhamiae*-Infections 2018**

- as Tinea capitis
  - davon Tinea capitis profunda
- as Tinea faciei
- as Tinea corporis
- as Tinea corporis + Tinea capitis
- as Tinea corporis + Tinea faciei
- as Tinea manuum
- as Tinea

|                      |
|----------------------|
| <input type="text"/> |
| <input type="text"/> |
| <input type="text"/> |
| <input type="text"/> |
| <input type="text"/> |
| <input type="text"/> |
| <input type="text"/> |
| <input type="text"/> |

- thereof culture grown

- thereof cultural underside

|       |     |               |
|-------|-----|---------------|
| /     | /   | /             |
| creme | red | yellow/orange |

- thereof diagnosed by PCR

- thereof contact with guinea pigs known
- thereof contact with animals known
- thereof contact with animals unknown

|                      |
|----------------------|
| <input type="text"/> |
| <input type="text"/> |
| <input type="text"/> |
